# Supplementary material for: Effect of social capital on enrolment of informal sector occupational groups in the national health insurance scheme in Ghana: a cross-sectional survey
Source: Springer Nature journal article supplement (doi:10.1186/s12913-024-11025-9), 2024-04-29
Supplement: MOESM1 [file 27034970]

Supplementary Table 1: Key demographic and socio-economic variables for the study area

| Demographic and socioeconomic factors             | Region        |           |             |            |
|---------------------------------------------------|---------------|-----------|-------------|------------|
|                                                   | Greater Accra | Ashanti   | Brong-Ahafo | Upper East |
| <b>Demography</b>                                 |               |           |             |            |
| Population (2010 PHC)                             | 4,010,054     | 4,780,380 | 2,310,983   | 1,046,545  |
| Population growth rate (%)                        | 3.1           | 2.7       | 2.3         | 1.2        |
| Sex ratio (male/female*100)                       | 93.6          | 94.0      | 98.2        | 93.8       |
| Mean household size                               | 2.6           | 2.9       | 3.6         | 4.3        |
| <b>Education</b>                                  |               |           |             |            |
| Literacy rate ( $\geq 11$ years)                  | 80.5          | 71.1      | 55.5        | 37.3       |
| <b>Main economic activity (occupation)</b>        |               |           |             |            |
| Service and sales workers                         | 630,377       | 580,748   | 129,938     | 46,991     |
| Skilled agriculture, forestry and fishery workers | 44,961        | 303,560   | 464,657     | 175,981    |
| Craft and related trade workers                   | 409,921       | 336,957   | 120,574     | 35,118     |
| Plant and machine union, and assemblers           | 98,250        | 86,109    | 24,938      | 4,037      |
| Elementary occupations                            | 80,865        | 80,020    | 63,598      | 22,876     |
| <b>Employment status</b>                          |               |           |             |            |
| Proportion of persons employed                    | 67.7          | 62.5      | 72.6        | 58.7       |
| Paid employee                                     | 539,441       | 476,817   | 112,400     | 44,190     |
| Own account worker                                | 917,831       | 992,658   | 521,160     | 248,828    |
| Contributing family worker                        | 48,441        | 79,802    | 160,267     | 7,942      |
| Domestic worker                                   | 11,667        | 6,024     | 4,691       | 686        |
| Casual worker                                     | 50,050        | 50,009    | 43,620      | 3,200      |
| Apprentice                                        | 15,757        | 12,309    | 6,480       | 2,262      |
| <b>Employment sector</b>                          |               |           |             |            |
| Civil service worker                              | 30,574        | 23,719    | 8,653       | 1,903      |
| Public service worker                             | 78,737        | 135,834   | 43,123      | 23,732     |
| Private (including cooperatives)                  | 1,464,132     | 1,496,589 | 797,049     | 283,496    |

|                                            |           |           |           |         |
|--------------------------------------------|-----------|-----------|-----------|---------|
| <b>Poverty incidence 2012/13 (%)</b>       | 5.6       | 14.8      | 27.9      | 44.4    |
| <b>Health</b>                              |           |           |           |         |
| Number of persons enrolled in NHIS         | 1,410,206 | 1,968,878 | 1,325,075 | 713,334 |
| Number of informal sector workers enrolled | 506,985   | 557,303   | 396,403   | 138,122 |
| Population to doctor ratio (year 2017)     | 3,052     | 6,888     | 10,059    | 26,484  |
| <b>Health facilities (year 2017)</b>       |           |           |           |         |
| Hospitals                                  | 107       | 153       | 39        | 10      |
| Health centres                             | 40        | 164       | 131       | 55      |
| Clinics & Polyclinics                      | 336       | 150       | 78        | 46      |
| Maternity homes                            | 104       | 69        | 39        | 2       |
| CHPS                                       | 498       | 1,122     | 665       | 255     |

PHC-Population and Housing Census; CHPS: Community-based Health Planning and Services. **Source:** [23–29]

Supplementary Table 2: Principal factor components and eigenvalues

| <b>Factor</b> | <b>Eigenvalue</b> | <b>Difference</b> | <b>Proportion</b> | <b>Cumulative</b> |
|---------------|-------------------|-------------------|-------------------|-------------------|
| Factor1       | 3.63031           | 1.68232           | 0.3025            | 0.3025            |
| Factor2       | 1.94799           | 0.78414           | 0.1623            | 0.4649            |
| Factor3       | 1.16385           | 0.03831           | 0.0970            | 0.5618            |
| Factor4       | 1.12554           | 0.23284           | 0.0938            | 0.6556            |
| Factor5       | 0.89270           | 0.16915           | 0.0744            | 0.7300            |
| Factor6       | 0.72355           | 0.16031           | 0.0603            | 0.7903            |
| Factor7       | 0.56324           | 0.01087           | 0.0469            | 0.8373            |
| Factor8       | 0.55238           | 0.07937           | 0.0460            | 0.8833            |
| Factor9       | 0.47301           | 0.09423           | 0.0394            | 0.9227            |
| Factor10      | 0.37878           | 0.06345           | 0.0316            | 0.9543            |
| Factor11      | 0.31533           | 0.08204           | 0.0263            | 0.9806            |
| Factor12      | 0.23329           | .                 | 0.0194            | 1.0000            |

LR test: independent vs. saturated:  $\chi^2(66) = 1802.49$  Prob> $\chi^2 = 0.0000$

Supplementary Table 3: Rotated factor loadings (pattern matrix) and unique variances sorted

| Variable | Factor1       | Factor2       | Factor3       | Factor4       | Uniqueness | KMO    | Cronbach's<br>$\alpha$ |
|----------|---------------|---------------|---------------|---------------|------------|--------|------------------------|
| q1_30_6  | <b>0.7070</b> | -0.1535       | 0.3805        | -0.0910       | 0.3235     | 0.8982 | 0.7494                 |
| q1_30_7  | <b>0.6856</b> | -0.0973       | 0.3928        | -0.0858       | 0.3588     | 0.7000 |                        |
| q1_30_5  | <b>0.6585</b> | 0.2566        | 0.0800        | 0.0802        | 0.4877     | 0.8344 |                        |
| q1_30_1  | <b>0.6153</b> | 0.2974        | 0.2228        | -0.1319       | 0.4659     | 0.5661 |                        |
| q1_30_3  | <b>0.5884</b> | 0.4767        | -0.1174       | 0.0769        | 0.4069     | 0.8667 |                        |
| q1_30_11 | 0.0277        | <b>0.8844</b> | 0.0608        | -0.0334       | 0.2123     | 0.7358 | 0.7792                 |
| q1_30_12 | -0.0104       | <b>0.8721</b> | 0.1667        | 0.0217        | 0.2111     | 0.7490 |                        |
| q1_30_10 | 0.4580        | <b>0.6261</b> | -0.0681       | -0.0365       | 0.3922     | 0.7191 |                        |
| q1_30_9  | 0.1564        | 0.0957        | <b>0.8551</b> | -0.0436       | 0.2333     | 0.7216 | 0.7619                 |
| q1_30_8  | 0.1446        | 0.1136        | <b>0.8390</b> | -0.0128       | 0.2621     | 0.8428 |                        |
| q1_30_2  | -0.1761       | -0.1034       | 0.0262        | <b>0.7618</b> | 0.3772     | 0.6659 | 0.2966                 |
| q1_30_4  | 0.0935        | 0.0830        | -0.1081       | <b>0.7560</b> | 0.4012     | 0.6661 |                        |
| Overall  |               |               |               |               |            | 0.7601 | 0.7526                 |

KMO: Kaiser-Meyer-Olkin measure of sampling adequacy

Supplementary Table 4: Average marginal effect estimates for the covariates for each outcome alternative (n=455)

| Variable                           | Delta-method |           |       |       |               |           |
|------------------------------------|--------------|-----------|-------|-------|---------------|-----------|
|                                    | dy/dx        | Std. Err. | z     | P>z   | [95%<br>Conf. | Interval] |
| <b>Social capital</b>              |              |           |       |       |               |           |
| Diversity membership<br>_predict   |              |           |       |       |               |           |
| 1                                  | -1.071372    | .2195127  | -4.88 | 0.000 | -1.501609     | -.6411348 |
| 2                                  | .4500469     | .4353053  | 1.03  | 0.301 | -.4031359     | 1.30323   |
| 3                                  | .621325      | .4287129  | 1.45  | 0.147 | -.2189368     | 1.461587  |
| Democratic functioning<br>_predict |              |           |       |       |               |           |
| 1                                  | -.1285419    | .1221313  | -1.05 | 0.293 | -.367915      | .1108311  |

|                                            |           |          |       |       |           |           |
|--------------------------------------------|-----------|----------|-------|-------|-----------|-----------|
| 2                                          | .1296619  | .1029204 | 1.26  | 0.208 | -.0720585 | .3313822  |
| 3                                          | -.0011199 | .1445501 | -0.01 | 0.994 | -.2844329 | .2821931  |
| Bonding (within group interaction)         |           |          |       |       |           |           |
| _predict                                   |           |          |       |       |           |           |
| 1                                          | -.1053721 | .063518  | -1.66 | 0.097 | -.229865  | .0191209  |
| 2                                          | .0041723  | .0996045 | 0.04  | 0.967 | -.1910489 | .1993936  |
| 3                                          | .1011997  | .0478679 | 2.11  | 0.035 | .0073803  | .1950192  |
| Bridging (outside group interaction)       |           |          |       |       |           |           |
| _predict                                   |           |          |       |       |           |           |
| 1                                          | .1665733  | .1047781 | 1.59  | 0.112 | -.0387879 | .3719346  |
| 2                                          | .0341124  | .103157  | 0.33  | 0.741 | -.1680717 | .2362964  |
| 3                                          | -.2006857 | .1374115 | -1.46 | 0.144 | -.4700073 | .0686359  |
| Trust in occupational and linguistic group |           |          |       |       |           |           |
| _predict                                   |           |          |       |       |           |           |
| 1                                          | .0100139  | .0131679 | 0.76  | 0.447 | -.0157947 | .0358226  |
| 2                                          | .0051661  | .0102483 | 0.50  | 0.614 | -.0149202 | .0252524  |
| 3                                          | -.01518   | .0058668 | -2.59 | 0.010 | -.0266788 | -.0036812 |
| Solidarity                                 |           |          |       |       |           |           |
| _predict                                   |           |          |       |       |           |           |
| 1                                          | -.0029425 | .0165449 | -0.18 | 0.859 | -.0353699 | .0294849  |
| 2                                          | -.0111607 | .0136413 | -0.82 | 0.413 | -.0378972 | .0155759  |
| 3                                          | .0141032  | .0121226 | 1.16  | 0.245 | -.0096568 | .0378631  |
| Trust in NHIS and HCP                      |           |          |       |       |           |           |
| _predict                                   |           |          |       |       |           |           |
| 1                                          | .0281978  | .0263701 | 1.07  | 0.285 | -.0234866 | .0798822  |

|                              |                |          |       |       |           |          |
|------------------------------|----------------|----------|-------|-------|-----------|----------|
| 2                            | -.0353967      | .0109694 | -3.23 | 0.001 | -.0568963 | -.013897 |
| 3                            | .0071989       | .0163269 | 0.44  | 0.659 | -.0248012 | .0391989 |
| <b>Trust in transactions</b> |                |          |       |       |           |          |
| <b>_predict</b>              |                |          |       |       |           |          |
| 1                            | -.0049826      | .0279654 | -0.18 | 0.859 | -.0597937 | .0498286 |
| 2                            | -.006127       | .0228359 | -0.27 | 0.788 | -.0508844 | .0386305 |
| 3                            | .0111096       | .010593  | 1.05  | 0.294 | -.0096524 | .0318715 |
| <b>Collective action</b>     |                |          |       |       |           |          |
| <b>_predict</b>              |                |          |       |       |           |          |
| 1                            | .3183683       | .1521544 | 2.09  | 0.036 | .0201512  | .6165854 |
| 2                            | -.2310169      | .1798192 | -1.28 | 0.199 | -.583456  | .1214222 |
| 3                            | -.0873514      | .0984945 | -0.89 | 0.375 | -.2803971 | .1056944 |
| <b>Sex</b>                   |                |          |       |       |           |          |
| Female                       | (base outcome) |          |       |       |           |          |
| <b>Male</b>                  |                |          |       |       |           |          |
| <b>_predict</b>              |                |          |       |       |           |          |
| 1                            | -.1565775      | .050915  | -3.08 | 0.002 | -.256369  | -.056786 |
| 2                            | -.0035386      | .0479474 | -0.07 | 0.941 | -.0975138 | .0904365 |
| 3                            | .1601161       | .0892689 | 1.79  | 0.073 | -.0148477 | .33508   |
| <b>Age</b>                   |                |          |       |       |           |          |
| <b>_predict</b>              |                |          |       |       |           |          |
| 1                            | -.0003779      | .0044127 | -0.09 | 0.932 | -.0090266 | .0082708 |
| 2                            | .0031543       | .0026693 | 1.18  | 0.237 | -.0020774 | .008386  |
| 3                            | -.0027764      | .0025615 | -1.08 | 0.278 | -.0077968 | .0022439 |
| <b>Marital status</b>        |                |          |       |       |           |          |
| <b>Single</b>                |                |          |       |       |           |          |
| <b>_predict</b>              |                |          |       |       |           |          |

|                            |                |          |       |       |           |           |
|----------------------------|----------------|----------|-------|-------|-----------|-----------|
| 1                          | -.002388       | .0522449 | -0.05 | 0.964 | -.104786  | .10001    |
| 2                          | .0486471       | .0430667 | 1.13  | 0.259 | -.0357621 | .1330563  |
| 3                          | -.0462591      | .0197765 | -2.34 | 0.019 | -.0850203 | -.0074979 |
| married                    | (base outcome) |          |       |       |           |           |
| Divorced/separated/widowed |                |          |       |       |           |           |
| _predict                   |                |          |       |       |           |           |
| 1                          | -.0343996      | .0387562 | -0.89 | 0.375 | -.1103604 | .0415612  |
| 2                          | .0513861       | .0711201 | 0.72  | 0.470 | -.0880067 | .190779   |
| 3                          | -.0169865      | .0990099 | -0.17 | 0.864 | -.2110425 | .1770694  |
| <b>Household size</b>      |                |          |       |       |           |           |
| _predict                   |                |          |       |       |           |           |
| 1                          | .0045008       | .006207  | 0.73  | 0.468 | -.0076648 | .0166663  |
| 2                          | .0051066       | .0043748 | 1.17  | 0.243 | -.0034678 | .013681   |
| 3                          | -.0096074      | .0021072 | -4.56 | 0.000 | -.0137375 | -.0054773 |
| <b>Ethnicity</b>           |                |          |       |       |           |           |
| Ewe                        |                |          |       |       |           |           |
| _predict                   |                |          |       |       |           |           |
| 1                          | .032029        | .027816  | 1.15  | 0.250 | -.0224892 | .0865473  |
| 2                          | .013291        | .0119406 | 1.11  | 0.266 | -.0101121 | .0366942  |
| 3                          | -.0453201      | .0395444 | -1.15 | 0.252 | -.1228257 | .0321856  |
| Ga/Dangme                  |                |          |       |       |           |           |
| _predict                   |                |          |       |       |           |           |
| 1                          | .0543342       | .0245611 | 2.21  | 0.027 | .0061955  | .102473   |
| 2                          | -.1347989      | .039269  | -3.43 | 0.001 | -.2117647 | -.0578331 |
| 3                          | .0804646       | .0212251 | 3.79  | 0.000 | .0388642  | .1220651  |

|                                |                   |          |       |       |           |           |  |
|--------------------------------|-------------------|----------|-------|-------|-----------|-----------|--|
| Akan                           | (base<br>outcome) |          |       |       |           |           |  |
| Busanga                        |                   |          |       |       |           |           |  |
| _predict                       |                   |          |       |       |           |           |  |
| 1                              | .1185339          | .0278281 | 4.26  | 0.000 | .0639919  | .1730758  |  |
| 2                              | -.1218935         | .0252543 | -4.83 | 0.000 | -.1713911 | -.0723959 |  |
| 3                              | .0033596          | .0410611 | 0.08  | 0.935 | -.0771186 | .0838379  |  |
| Other                          |                   |          |       |       |           |           |  |
| _predict                       |                   |          |       |       |           |           |  |
| 1                              | -.0182502         | .1476114 | -0.12 | 0.902 | -.3075633 | .2710629  |  |
| 2                              | -.0700819         | .0896299 | -0.78 | 0.434 | -.2457534 | .1055895  |  |
| 3                              | .0883322          | .1469733 | 0.60  | 0.548 | -.1997302 | .3763945  |  |
| <b>Highest education level</b> |                   |          |       |       |           |           |  |
| None                           | (base<br>outcome) |          |       |       |           |           |  |
| Primary                        |                   |          |       |       |           |           |  |
| _predict                       |                   |          |       |       |           |           |  |
| 1                              | -.1963219         | .107662  | -1.82 | 0.068 | -.4073355 | .0146918  |  |
| 2                              | .1278617          | .062683  | 2.04  | 0.041 | .0050053  | .250718   |  |
| 3                              | .0684602          | .0822004 | 0.83  | 0.405 | -.0926496 | .22957    |  |
| Middle school/JSS/JHS          |                   |          |       |       |           |           |  |
| _predict                       |                   |          |       |       |           |           |  |
| 1                              | -.1421356         | .0260396 | -5.46 | 0.000 | -.1931723 | -.0910989 |  |
| 2                              | .1821662          | .0406848 | 4.48  | 0.000 | .1024254  | .2619069  |  |
| 3                              | -.0400306         | .0164374 | -2.44 | 0.015 | -.0722472 | -.007814  |  |
| Secondary/SSS/SHS/vocational   |                   |          |       |       |           |           |  |
| _predict                       |                   |          |       |       |           |           |  |

|                                    |           |          |       |       |           |           |
|------------------------------------|-----------|----------|-------|-------|-----------|-----------|
| 1                                  | -.1307849 | .0231626 | -5.65 | 0.000 | -.1761828 | -.0853869 |
| 2                                  | .2318463  | .0378924 | 6.12  | 0.000 | .1575786  | .306114   |
| 3                                  | -.1010614 | .0203275 | -4.97 | 0.000 | -.1409026 | -.0612202 |
| <b>Tertiary</b>                    |           |          |       |       |           |           |
| <b>_predict</b>                    |           |          |       |       |           |           |
| 1                                  | .017628   | .0942723 | 0.19  | 0.852 | -.1671424 | .2023983  |
| 2                                  | .1119337  | .0859966 | 1.30  | 0.193 | -.0566165 | .280484   |
| 3                                  | -.1295617 | .0250245 | -5.18 | 0.000 | -.1786088 | -.0805145 |
| <b>Occupational sector</b>         |           |          |       |       |           |           |
| <b>Service</b>                     |           |          |       |       |           |           |
| <b>_predict</b>                    |           |          |       |       |           |           |
| 1                                  | -.173754  | .0620737 | -2.80 | 0.005 | -.2954161 | -.0520918 |
| 2                                  | .0744549  | .0401344 | 1.86  | 0.064 | -.0042072 | .1531169  |
| 3                                  | .0992991  | .091887  | 1.08  | 0.280 | -.0807961 | .2793943  |
| <b>Industry/commercial</b>         |           |          |       |       |           |           |
| <b>(base outcome)</b>              |           |          |       |       |           |           |
| <b>Agriculture</b>                 |           |          |       |       |           |           |
| <b>_predict</b>                    |           |          |       |       |           |           |
| 1                                  | -.2192247 | .0765323 | -2.86 | 0.004 | -.3692251 | -.0692242 |
| 2                                  | .1590061  | .0770233 | 2.06  | 0.039 | .0080432  | .309969   |
| 3                                  | .0602186  | .0940077 | 0.64  | 0.522 | -.1240332 | .2444704  |
| <b>Average monthly income</b>      |           |          |       |       |           |           |
| <b>_predict</b>                    |           |          |       |       |           |           |
| 1                                  | 4.31e-06  | .0000367 | 0.12  | 0.906 | -.0000675 | .0000762  |
| 2                                  | 1.98e-07  | .0000413 | 0.00  | 0.996 | -.0000807 | .0000811  |
| 3                                  | -4.51e-06 | 8.61e-06 | -0.52 | 0.600 | -.0000214 | .0000124  |
| <b>Self-reported health status</b> |           |          |       |       |           |           |



|                             |                   |          |       |       |           |          |  |
|-----------------------------|-------------------|----------|-------|-------|-----------|----------|--|
| Very good                   | (base<br>outcome) |          |       |       |           |          |  |
| Good                        |                   |          |       |       |           |          |  |
| _predict                    |                   |          |       |       |           |          |  |
| 1                           | .0721541          | .0428033 | 1.69  | 0.092 | -.0117387 | .156047  |  |
| 2                           | -.0834921         | .0522098 | -1.60 | 0.110 | -.1858215 | .0188373 |  |
| 3                           | .0113379          | .0190328 | 0.60  | 0.551 | -.0259657 | .0486416 |  |
| Fair                        |                   |          |       |       |           |          |  |
| _predict                    |                   |          |       |       |           |          |  |
| 1                           | .0517758          | .0096334 | 5.37  | 0.000 | .0328946  | .0706569 |  |
| 2                           | -.0502598         | .0774851 | -0.65 | 0.517 | -.2021278 | .1016083 |  |
| 3                           | -.001516          | .0754695 | -0.02 | 0.984 | -.1494335 | .1464015 |  |
| Poor                        |                   |          |       |       |           |          |  |
| _predict                    |                   |          |       |       |           |          |  |
| 1                           | -.0530921         | .2076275 | -0.26 | 0.798 | -.4600346 | .3538503 |  |
| 2                           | .0041517          | .2347888 | 0.02  | 0.986 | -.4560259 | .4643294 |  |
| 3                           | .0489404          | .1545047 | 0.32  | 0.751 | -.2538832 | .351764  |  |
| <b>Usual source of care</b> |                   |          |       |       |           |          |  |
| Hospital                    | (base<br>outcome) |          |       |       |           |          |  |
| Clinic/Health centre        |                   |          |       |       |           |          |  |
| _predict                    |                   |          |       |       |           |          |  |
| 1                           | .109002           | .0837898 | 1.30  | 0.193 | -.055223  | .2732269 |  |
| 2                           | -.1140872         | .1129781 | -1.01 | 0.313 | -.3355203 | .1073459 |  |
| 3                           | .0050852          | .0459513 | 0.11  | 0.912 | -.0849777 | .0951481 |  |
| Pharmacy                    |                   |          |       |       |           |          |  |
| _predict                    |                   |          |       |       |           |          |  |

|   |           |          |       |       |           |           |
|---|-----------|----------|-------|-------|-----------|-----------|
| 1 | -.1763348 | .0748192 | -2.36 | 0.018 | -.3229777 | -.0296918 |
| 2 | .0595732  | .0909635 | 0.65  | 0.513 | -.118712  | .2378583  |
| 3 | .1167616  | .0360793 | 3.24  | 0.001 | .0460474  | .1874758  |

**Note:** dy/dx for factor levels is the discrete change from the base level.

Outcome variable 1=Currently enrolled

Outcome variable 2=Previously enrolled

Outcome variable 3=Never enrolled

Supplementary Table 5: Reasons for not enrolling in the NHIS by occupational group (n=323)

| <b>Variable</b>                               | <b>Farmers</b> | <b>Commercial road transport drivers</b> | <b>Beauticians and hairdressers</b> | <b>All</b> |
|-----------------------------------------------|----------------|------------------------------------------|-------------------------------------|------------|
|                                               | n (%)          | n (%)                                    | n (%)                               | n (%)      |
| <b>Membership in other health insurance</b>   |                |                                          |                                     |            |
| I have other health insurance scheme          | 0              | 8 (6.0)                                  | 8 (7.2)                             | 16 (5.0)   |
| <b>Knowledge of NHIS</b>                      |                |                                          |                                     |            |
| Never heard of NHIS                           | 0              | 3 (2.3)                                  | 19 (17.1)                           | 22 (6.8)   |
| I have heard of NHIS but didn't know benefits | 0              | 18 (13.5)                                | 22 (19.8)                           | 40 (12.4)  |
| Did not know how much to pay for premium      | 0              | 32 (24.1)                                | 24 (21.6)                           | 56 (17.3)  |
| Did not know how to enrol and renew           | 0              | 28 (21.1)                                | 19 (17.1)                           | 47 (14.6)  |
| <b>Benefits of NHIS</b>                       |                |                                          |                                     |            |
| NHIS does not cover health services needed    | 0              | 33 (24.8)                                | 38 (34.2)                           | 71 (22.0)  |
| NHIS does not save healthcare cost            | 1 (1.3)        | 32 (24.1)                                | 45 (40.5)                           | 78 (24.2)  |

|                                                                |           |           |           |            |
|----------------------------------------------------------------|-----------|-----------|-----------|------------|
| NHIS benefit is too low or not enough                          | 1 (1.3)   | 29 (21.8) | 45 (40.5) | 75 (23.2)  |
| <b>Affordability of contributions</b>                          |           |           |           |            |
| Cannot afford the premium/registration/renewal fees            | 34 (43.0) | 15 (11.3) | 22 (19.8) | 71 (22.0)  |
| <b>Convenience of enrolment</b>                                |           |           |           |            |
| Premium payment interval is too short (yearly)                 | 1 (1.3)   | 13 (9.8)  | 30 (27.0) | 44 (13.6)  |
| Premium payment interval is too long (yearly)                  | 1 (1.3)   | 12 (9.0)  | 24 (21.6) | 37 (11.5)  |
| Distance to NHIS office is too far                             | 16 (20.3) | 51 (38.4) | 48 (43.2) | 115 (35.6) |
| Working hours of NHIS is not good for me                       | 10 (12.7) | 63 (47.4) | 31 (27.9) | 104 (32.2) |
| Long waiting hours in NHIS office                              | 4 (5.1)   | 94 (70.7) | 71 (64.0) | 169 (52.3) |
| <b>Need for healthcare services</b>                            |           |           |           |            |
| Do not need health care/not sick/mostly healthy                | 19 (24.1) | 37 (27.8) | 47 (42.3) | 103 (31.9) |
| Healthcare facilities are too far                              | 0         | 30 (22.6) | 27 (24.3) | 57 (17.7)  |
| Quality of health services are not good                        | 1 (1.3)   | 23 (17.3) | 37 (33.3) | 61 (18.9)  |
| Attitude of healthcare provider is not good                    | 1 (1.3)   | 29 (21.8) | 33 (29.7) | 63 (19.5)  |
| Waiting time for health services is too long                   | 0         | 40 (30.1) | 46 (41.4) | 86 (26.6)  |
| Working hours of health facilities are not good                | 0         | 19 (14.3) | 24 (21.6) | 43 (13.3)  |
| <b>Attitude of household or community members towards NHIS</b> |           |           |           |            |

|                                                          |           |           |           |           |
|----------------------------------------------------------|-----------|-----------|-----------|-----------|
| Household members not in favour of enrolling in the NHIS | 16 (20.3) | 22 (16.5) | 15 (13.5) | 53 (16.4) |
| Community members not in favour of enrolling in the NHIS | 5 (6.3)   | 14 (10.5) | 14 (12.6) | 33 (10.2) |
| Other reason (e.g., lack of trust)                       | 15 (19.0) | 5 (3.8)   | 6 (5.4)   | 26 (8.1)  |
